# Supplementary material
Source: PubMed Central journal article supplement (PMC4500670)
Supplement: NIHMS696799-supplement.pdf [file NIHMS696799-supplement.pdf]

Table S1. Alignment of proteins in group IA around Cys448 in LodA

| Locus tag          | Organism                                      | Sequence of residues 430-463 in LodA      |
|--------------------|-----------------------------------------------|-------------------------------------------|
|                    |                                               | <b>xhxxxDxxxhGNCVgxPxCPGIEVTWSxxlxxhy</b> |
| Marme_2662 LodA    | LodA <i>Marinomonas mediterranea</i> MMB-1    | PVSDMDTASIGNCVGLPMCPGIEVTWSLQNPVIY        |
| Mmwy11_3721        | <i>Marinomonas</i> sp. MMYL1                  | PVNEMDAASIGNCVGLPMCPGIEVTWSLQNSKLY        |
| M320_pool_00037300 | <i>Marinomonas</i> sp GOBB3-320               | YVNEMDAASIGNCVGLPMCPGIEVTWSLQNSKLY        |
| PTD2_20217         | <i>Pseudoalteromonas tunicata</i> D2          | AVHPLDKASIGNCVGLPMCPGIEVTWSLQNPPLY        |
| G509DRAFT_1169     | <i>Flavobacterium subsaxonicum</i> DSM 21790  | PVSLDDTASVGNVGLPMCPGIEVTWSMQNPAVY         |
| PCIT_22609         | <i>Pseudoalteromonas citrea</i> NCIMB 1889    | PVDPLDQGSVGNVGLPMCPGIEVTWSLQNPVY          |
| Rhein_1334         | <i>Rheinheimera</i> sp. A13L                  | PVNPDLQGSVGNVGLPMCPGIEVTWSMQNPAVY         |
| H527DRAFT_03370    | <i>Aquimarina muelleri</i> DSM 19832          | AISEIDMASVGNVGLPMCPGIEVTWSLQENIY          |
| PL2TA16_00557      | <i>Pseudoalteromonas luteoviolacea</i> 2ta16  | GVFYADQSSVGNVGLPMCPGIEVTWSMQNPAVY         |
| PflaDRAFT_00041100 | <i>Pseudoalteromonas flavipulchra</i> 2ta6    | GVFYADQGSVGNVGLPMCPGIEVTWSLQNPVY          |
| UY7DRAFT_03653     | <i>Pseudoalteromonas flavipulchra</i> JG1     | GVFYADQGSVGNVGLPMCPGIEVTWSLQNPVY          |
| PPIS_19511         | <i>Pseudoalteromonas piscicida</i> JCM 20779  | GVFYADQGSVGNVGLPMCPGIEVTWSLQNPVY          |
| G366DRAFT_02721    | <i>Pseudoalteromonas piscicida</i> ATCC 15057 | GVFYADQGSVGNVGLPMCPGIEVTWSLQNPVY          |
| Gei7105DRAFT_0285  | <i>Geitlerinema</i> sp. PCC 7105              | GVDDRDRASVGNVGLPQCPGIEVTWTTQNPVY          |
| Nha1_1391          | <i>Nitrosococcus halophilus</i> Nc4           | PLCSATSAAMGNVGLPMCPGIEVTWSMQNPAIY         |
| F460DRAFT_04769    | <i>Duganella zoogloeoides</i> ATCC 25935      | GIAALDRAAIGNCVGEPMPGIEVTWSVRNPVIY         |
| 2520384729*        | <i>Nitrolancetus hollandicus</i> Lb           | GIHPLDRVDIGNCVGDPMPGIEVTWSVRNPAIY         |
| G559DRAFT_00896    | <i>Pseudomonas resinovorans</i> DSM 21078     | GVTALDRASVGNVGGPLCPGIEVTWSLYSPELY         |
| CC1582_00022990    | <i>Pseudomonas viridaflava</i> CC1582         | NVTDLDRASVGNVGGPFCPGIEVTWSLYSKALY         |
| TA043_00024900     | <i>Pseudomonas viridaflava</i> TA043          | NVTDLDRASVGNVGGPFCPGIEVTWSLYSKALY         |

Blue, consensus 100%; Red, >90%; H, hydrophobic residue; 1, N or S  
 \*, IMG gene identification

Table S2. Alignment of proteins in group IA around Lys530 in LodA

| Locus tag          | Organism                                      | Sequence of residues 494-590 in LodA          |                             |
|--------------------|-----------------------------------------------|-----------------------------------------------|-----------------------------|
|                    |                                               | <b>xGC1PGDLTKRMAxPWQADFFxC32Qx2NFxxcPxhNK</b> | <b>PxxPxYYxYWWPPQSPWDV4</b> |
| Marme_2662         | LodA <i>Marinomonas mediterranea</i> MMB-1    | TGCEPGDLTKRMACPWQADFFNCTVQVNFSEPSVNK (x) 40   | PLPPAYYSYWWPPQSPWDVL        |
| Mmwy11_3721        | <i>Marinomonas</i> sp. MWYL1                  | VGCEPGDLTKRMACPWQADFFNCTVQVNFSEPKVNK (x) 40   | PLPPAYYSYWWPPQSPWDVL        |
| M320_pool_00037300 | <i>Marinomonas</i> sp GOBB3-320               | GGCEPGDLTKRMACPWQADFFNCTVQVNFSEPKVNK (x) 40   | PLPPAYYSYWWPPQSPWDVL        |
| PTD2_20217         | <i>Pseudoalteromonas tunicata</i> D2          | GGCQPGDLTKRMACPWQADFFQCTVQPVNFTEPLINK (x) 74  | PITPTYYSYWWPPQSPWDVL        |
| G509DRAFT_1169     | <i>Flavobacterium subsaxonicum</i> DSM 21790  | GGCEPGDLTKRMACPWQADFFECTIQTNINFSDPVANK (x) 08 | PLPPTYYSYWWPPQSPWDVI        |
| PCIT_22609         | <i>Pseudoalteromonas citrea</i> NCIMB 1889    | GGCEPGDLTKRMACPWQADFFQCTIQNINFTNPAKKNK (x) 04 | PLPPTYYSYWWPPQSPWDVL        |
| Rhein_1334         | <i>Rheinheimera</i> sp. A13L                  | GGCQPGDLTKRMACPWQADFFQCTVQPVNFTEVPEVNK (x) 04 | PLPPTYAYWWPPQSPWDVL         |
| H527DRAFT_03370    | <i>Aquimarina muelleri</i> DSM 19832          | GGCEPGDLTKRMACPWQADFFQCTIQYINFSDEINK (x) 34   | PLPPSYTYWWPPQSPWDVL         |
| PL2TA16_00557      | <i>Pseudoalteromonas luteoviolacea</i> 2ta16  | GGCQPGDLTKRMACPWQADFFNCTIQNVNFTDPTVNK (x) 12  | PLAPTYYSYWWPPQSPWDVL        |
| PflaDRAFT_00041100 | <i>Pseudoalteromonas flavipulchra</i> 2ta6    | GGCQPGDLTKRMACPWQADFFNCTIQNVNFTTEPTVNK (x) 12 | PAAPTYYSYWWPPQSPWDVL        |
| UY7DRAFT_03653     | <i>Pseudoalteromonas flavipulchra</i> JG1     | GGCQPGDLTKRMACPWQADFFNCTIQNVNFTTEPTVNK (x) 12 | PAAPTYYSYWWPPQSPWDVL        |
| PPIS_19511         | <i>Pseudoalteromonas piscicida</i> JCM 20779  | GGCQPGDLTKRMACPWQADFFNCTIQNVNFTTEPTVNK (x) 12 | PAAPTYYSYWWPPQSPWDVL        |
| G366DRAFT_02721    | <i>Pseudoalteromonas piscicida</i> ATCC 15057 | GGCQPGDLTKRMACPWQADFFNCTIQNVNFTTEPTVNK (x) 12 | PAAPTYYSYWWPPQSPWDVL        |
| Gei7105DRAFT_0285  | <i>Geitlerinema</i> sp. PCC 7105              | GGCEPGDLTKRMAIPWQADFFNCSIQFVNFTDPNVNK (x) 09  | PKPPTYYSYWWPPQAPWNVL        |
| Nhal_1391          | <i>Nitrosococcus halophilus</i> Nc4           | GGCEPGDLTKRMAIPWQADFFNCTIQYVNFTDPDINK (x) 04  | PLPPSYAYWWPPQAPWDVL         |
| F460DRAFT_04769    | <i>Duganella zoogloeoides</i> ATCC 25935      | SGCEPGDLTKRMAIPWQADFYDCSVQMINFDNPDLVK (x) 06  | PVPPTYAYWWPPQSPWNVI         |
| 2520384729*        | <i>Nitrolanceetus hollandicus</i> Lb          | GGCEPGDLTKRMAIPWQADFFACSVQYINFTDPNVNK (x) 04  | PKPPTFFAYWWPPQSPMHVI        |
| G559DRAFT_00896    | <i>Pseudomonas resinovorans</i> DSM 21078     | QGCEPGDLTKRMAIPWQADFFQCTVQYVNFTDPEVNK (x) 04  | PKAPSYAYWWPPQSPWNVL         |
| CC1582_00022990    | <i>Pseudomonas viridaflava</i> CC1582         | QGCEPGDLTKRMATPWQSDFFQCTVQYINFSDSANK (x) 04   | PKPPTYAYWWPPQSPWNVI         |
| TA043_00024900     | <i>Pseudomonas viridaflava</i> TA043          | QGCEPGDLTKRMATPWQSDFFQCTVQYINFSNDANK (x) 04   | PKPPTYAYWWPPQSPWNVI         |

Blue, consensus 100%; Red, >90%; h: hydrophobic residue; 1, E or Q; 2, I or V; 3, S or T; 4, I or L

\*, IMG gene identification

Table S3. Alignment of proteins in group IA around Tyr211 in LodA

| Locus tag          | Organism                                      | Sequence of residues 182-230 in LodA                           |
|--------------------|-----------------------------------------------|----------------------------------------------------------------|
|                    |                                               | LGxhxTDxxGR <sup>Lh</sup> VhGGxGxAGGxxxhx123GxxxWxDDx4DGxVxCxh |
| Marme_2662         | LodA <i>Marinomonas mediterranea</i> MMB-1    | LGLRLTDSQGRLLIVLGGYGFAGGNTDLSGYGGGDDWYDDISDGSVTCVV             |
| Mmwy11_3721        | <i>Marinomonas</i> sp. MWYL1                  | LGTLLTDDKGRLLIVLGGYGRAGGNTDLEGYGGGDEWFDDISDGPVTCVV             |
| M320_pool_00037300 | <i>Marinomonas</i> sp GOBB3-320               | LGLRLTDNKGRLLIVLGGYGRAGGNTDLEGYGGGDEWFDDISDGPVTCVV             |
| PTD2_20217         | <i>Pseudoalteromonas tunicata</i> D2          | LGLTKTDNKGRLLIVFGGYGHAGGDEALTSYGGSDTWHDDIADGPPVYCEV            |
| G509DRAFT_1169     | <i>Flavobacterium subsaxonicum</i> DSM 21790  | LGNLLTDASGRLLVVLGGYGNAGGNEPLTSYGGSDTWHDDISDGPVYCTV             |
| PCIT_22609         | <i>Pseudoalteromonas citrea</i> NCIMB 1889    | LGDLLKTDNEGRLLIVLGGYGHAGGDKPLVSYGGSDTWHDDIADGPPVYCTV           |
| Rhein_1334         | <i>Rheinheimera</i> sp. A13L                  | LGDLLTDDLGRLLIVLGGYGNAGGDEPLTSYGGSDTWHDDISDGPVYCTV             |
| H527DRAFT_03370    | <i>Aquimarina muelleri</i> DSM 19832          | LGDLLTDDDEGRLLIVLGGYGHAGGNEPLTSYGGSDTWHDDISDGPVYCTI            |
| PL2TA16_00557      | <i>Pseudoalteromonas luteoviolacea</i> 2ta16  | LGNILTDNEGRLLVVLGGFGNAGGNEPLESYGGADTWHDDIADGTVYCTV             |
| PflaDRAFT_00041100 | <i>Pseudoalteromonas flavipulchra</i> 2ta6    | LGDILTDNEGRLLVVLGGKGNAGGNLPESYGGADTWHDDIADGTVYCTV              |
| UY7DRAFT_03653     | <i>Pseudoalteromonas flavipulchra</i> JG1     | LGDILTDNEGRLLVVLGGKGNAGGNQPLESYGGADTWHDDIADGTVYCTV             |
| PPIS_19511         | <i>Pseudoalteromonas piscicida</i> JCM 20779  | LGDILTDNEGRLLVVLGGKGNAGGNQPLESYGGADTWHDDIADGTVYCTV             |
| G366DRAFT_02721    | <i>Pseudoalteromonas piscicida</i> ATCC 15057 | LGDILTDNEGRLLVVLGGKGNAGGNQPLESYGGADTWHDDIADGTVYCTV             |
| Gei7105DRAFT_0285  | <i>Geitlerinema</i> sp. PCC 7105              | LGTLLKTDSSGRLLVVLGGFGKSGGDLPLSSYGGADTWYDDISDGSVTCVI            |
| Nha1_1391          | <i>Nitrosococcus halophilus</i> Nc4           | LGTIKTDREGRLLVGLGAYGRAGGDEPITSYGGADTWYDDIADGPVECTV             |
| F460DRAFT_04769    | <i>Duganella zoogloeoides</i> ATCC 25935      | LGMERTDSAGNLLVIGAYGRAGGIDPITGFGGGDTWNDDIADGPVATV               |
| 2520384729*        | <i>Nitrolancetus hollandicus</i> Lb           | LGDLLTADGRLLVVLGGFGKAGGSEPITSFAGADTWHDDVSDGPVSKL               |
| G559DRAFT_00896    | <i>Pseudomonas resinovorans</i> DSM 21078     | LGMERTDQQGRLLVVLGGYGHAGGNQSITSFAGADGWHDDISDGPVCTL              |
| CC1582_00022990    | <i>Pseudomonas viridaflava</i> CC1582         | LGGVLTDNKGRLLVVLGGYGHAGGDQSITSFAGADTWHDDTSDGPVCTL              |
| TA043_00024900     | <i>Pseudomonas viridaflava</i> TA043          | LGGVLTDKKGRLLVVLGGYGHAGGDQSITSFAGADTWHDDTSDGPVCTL              |

Blue, consensus 100%; Red, >90%; h: hydrophobic residue; 1, G or S; 2, Y or F; 3, G or A; 4, S or A

\*, IMG gene identification
